# Supplementary material for: Utility of circulating cell-free Mycobacterium tuberculosis DNA for the improved diagnosis of abdominal tuberculosis
Source: PubMed Central journal article supplement (PMC7449497; doi:10.1371/journal.pone.0238119), 2020-08-26
Supplement: pone.0238119.s001.pdf [file pone.0238119.s001.pdf]

**S1 APPENDIX  
(CASE RECORD FORM)**

**Name :** \_\_\_\_\_ **Age :** \_\_\_\_\_ **Sex :** M / F  
**CR No:** \_\_\_\_\_ **Date of admission :** \_\_\_\_\_ **Date of discharge :** \_\_\_\_\_  
**Postal address:** \_\_\_\_\_ **Occupation :** \_\_\_\_\_ **Phone :** \_\_\_\_\_

| History                    | 1 if yes, 0 if No,<br>Duration (days) | Examination                                                                                                                                              | 1 if yes, 0 if No |
|----------------------------|---------------------------------------|----------------------------------------------------------------------------------------------------------------------------------------------------------|-------------------|
| Fever                      |                                       | Lympadenopathy                                                                                                                                           |                   |
| Headache                   |                                       | Cold abscess                                                                                                                                             |                   |
| Vomiting                   |                                       | Spine deformity                                                                                                                                          |                   |
| Loss of appetite           |                                       | Rash                                                                                                                                                     |                   |
| Constipation               |                                       | Type of rash: (encircle)                                                                                                                                 |                   |
| Diarrhoea                  |                                       | Petechial /Pupuric /maculopapular /vescicular/other                                                                                                      |                   |
| Weight loss                |                                       | Pallor/ Clubbing /I/Cy/JVP/PE                                                                                                                            |                   |
| Night Sweats               |                                       | Any other finding on general physical examination:                                                                                                       |                   |
| Abdominal pain             |                                       |                                                                                                                                                          |                   |
| Cough                      |                                       | Chest examination: RR/Trachea/Air entry/Adventitious sound                                                                                               |                   |
| Chest pain                 |                                       |                                                                                                                                                          |                   |
| Seizure                    |                                       | CVS examination:                                                                                                                                         |                   |
| Focal seizures             |                                       | Heart sounds muffled : Yes/No                                                                                                                            |                   |
| HTN/CLD/CRF<br>/CHF/RA/SLE |                                       | Worst GCS:                                                                                                                                               |                   |
| DM                         |                                       | Decerebrate/decorticate posturing                                                                                                                        |                   |
| Hemoptysis                 |                                       | Focal deficits                                                                                                                                           |                   |
| Altered sensorium          |                                       | Extrapyramidal signs:<br>Type of deficit (encircle): Chorea, Dystonia, Tremor ,<br>Athetosis, Ballismus, Hemiparesis, Monoparesis, Aphasia,<br>Blindness |                   |
| BCG Scar                   |                                       |                                                                                                                                                          |                   |
| Contact with TB Patient    |                                       |                                                                                                                                                          |                   |
| Alcohol                    |                                       | Cranial Nerve involvement and details:                                                                                                                   |                   |
| Drug user history          |                                       | Hepatomegaly                                                                                                                                             |                   |
| Smoking                    |                                       | Splenomegaly                                                                                                                                             |                   |
| Head injury/neurosurgery   |                                       | Ascites                                                                                                                                                  |                   |
| Ear discharge              |                                       | Any other significant finding                                                                                                                            |                   |
| Amenorrhoea                |                                       |                                                                                                                                                          |                   |

|                                   |             |  |            |  |             |  |          |  |     |
|-----------------------------------|-------------|--|------------|--|-------------|--|----------|--|-----|
| <b>Investigations:</b>            |             |  |            |  |             |  |          |  |     |
| <b>Haemogram</b>                  | Hb          |  | TLC        |  | ESR         |  | Platelet |  |     |
| <b>DLC</b>                        |             |  |            |  |             |  |          |  |     |
| <b>LFT</b>                        | D Bil       |  | I Bil      |  | AST         |  | ALT      |  | ALP |
| <b>KFT</b>                        | Urea        |  | Creatinine |  | Uric Acid   |  |          |  |     |
| <b>Serum protein</b>              | Total       |  | Albumin    |  | Globulin    |  |          |  |     |
| <b>Sputum AFB</b>                 |             |  |            |  |             |  |          |  |     |
| <b>HIV/Cancer/Steroid therapy</b> |             |  |            |  |             |  |          |  |     |
| <b>Mantoux</b>                    | <b>Pos.</b> |  |            |  | <b>Neg.</b> |  |          |  |     |

| Fluid analysis<br>(fill in relevant columns for each fluid type) | Pleural fluid | Ascitic fluid | CSF | Pericardial Fluid | Liver abscess fluid | Urine | Any Other fluid |
|------------------------------------------------------------------|---------------|---------------|-----|-------------------|---------------------|-------|-----------------|
| Color                                                            |               |               |     |                   |                     |       |                 |
| Cytology :total cells/ml                                         |               |               |     |                   |                     |       |                 |
| Cytology :differential                                           |               |               |     |                   |                     |       |                 |
| Sugar                                                            |               |               |     |                   |                     |       |                 |
| Concomitant Blood Sugar (mg/dL)                                  |               |               |     |                   |                     |       |                 |
| Protein (F+S)                                                    |               |               |     |                   |                     |       |                 |
| LDH (F+S)                                                        |               |               |     |                   |                     |       |                 |
| Albumin (F+S)                                                    |               |               |     |                   |                     |       |                 |
| SAAG ratio                                                       |               |               |     |                   |                     |       |                 |
| Light's criteria                                                 |               |               |     |                   |                     |       |                 |
| ADA                                                              |               |               |     |                   |                     |       |                 |

Whether bacterial/viral/fungal isolation from other sites: Yes/ No If yes, what site.....

|                                      |                      |                |            |                                 |               |              |                   |
|--------------------------------------|----------------------|----------------|------------|---------------------------------|---------------|--------------|-------------------|
| <b>CT /MRI brain (tick ✓ if yes)</b> | Hydrocephalus        | Basal exudates | TB Abscess | Ependymal/meningeal enhancement | Infarcts      | Tuberculomas | Bacterial Abscess |
| <b>2D echo</b>                       | <b>Pre treatment</b> |                |            | <b>Post treatment</b>           |               |              |                   |
| <b>CXR</b>                           | Effusion             | Hazy lucencies | Miliary    | Cavity                          | Consolidation | Collapse     | Mediastinal LAP   |

**Whether AFB found in other fluids: Yes/No**

If yes, where: Sputum/Gastric aspirate/BAL/Pleural fluid/other.....

**Whether FNAC/HPE of any tissue done: Y/ N**

If yes, which tissue:.....

Finding: Inconclusive/ granulomas/ caseating granuloma/ other.....

**USG/CT abdomen** if done: Ascites/LAP/ ileal thickening/ other findings.....

Any other investigation done to support the diagnosis with findings:

**Provisional Diagnosis:**

Any other investigation:

**Follow up:**

**ATT treatment: Yes/No, (If yes: then Duration .....days); Weight Gain.....(yes / no)**

**Date of Start of ATT:..... Date of Completion of ATT:.....**

**Any other test done to confirm follow up:**

.....  
Signature of Senior Resident  
Name:.....
